# Supplementary material
Source: PubMed Central journal article supplement (PMC8396075)
Supplement: NIHMS1730875-supplement-Supporting_Information.pdf [file NIHMS1730875-supplement-Supporting_Information.pdf]

**Analytical and Bioanalytical Chemistry**

**Electronic Supplementary Material**

**Intraoperative detection of isocitrate dehydrogenase mutations in human gliomas using a miniature mass spectrometer**

Hannah Marie Brown, Fan Pu, Mahua Dey, James Miller, Mitesh V. Shah, Scott A. Shapiro, Zheng Ouyang, Aaron A. Cohen-Gadol, R. Graham Cooks

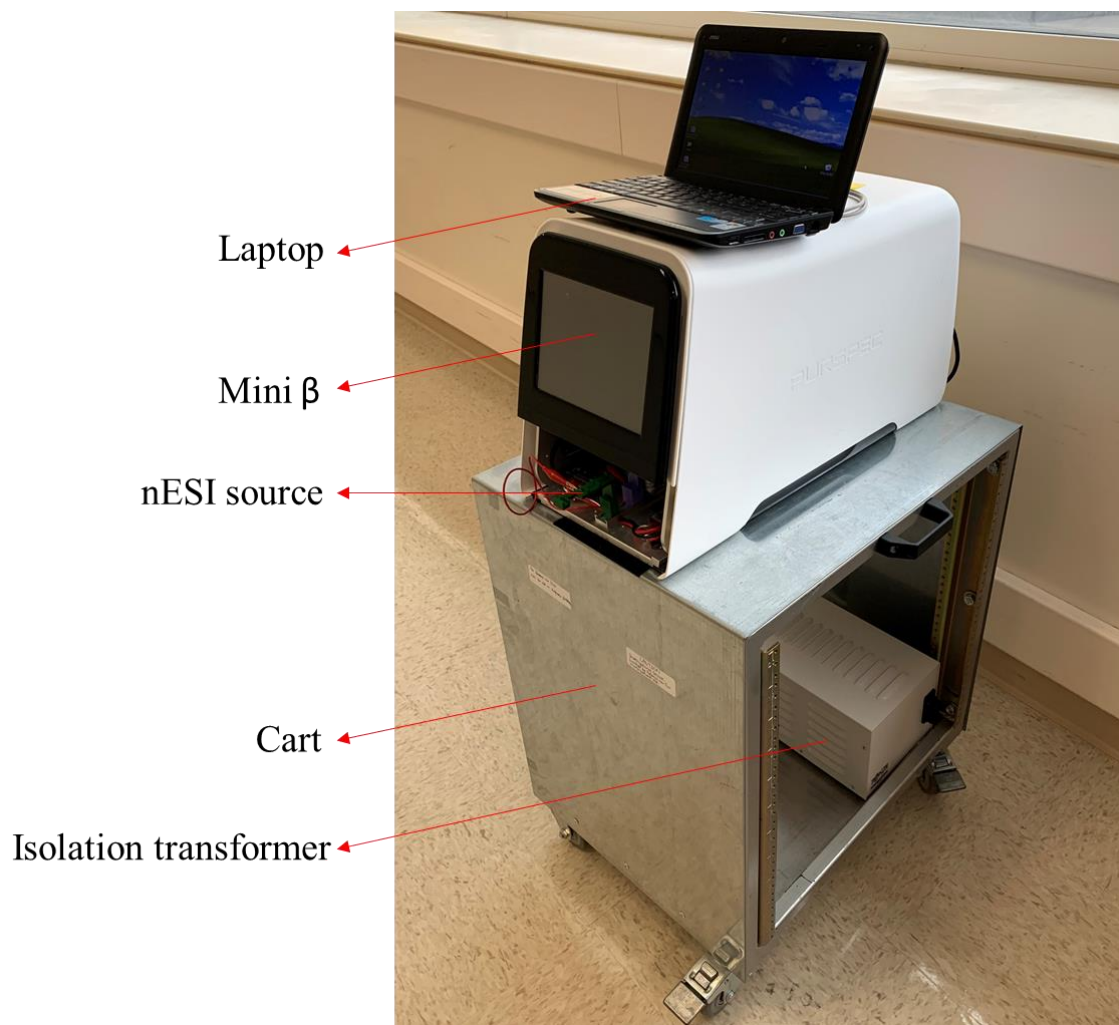

**Fig. S1** System view of intraoperative Mini MS setup, the cart is mostly empty

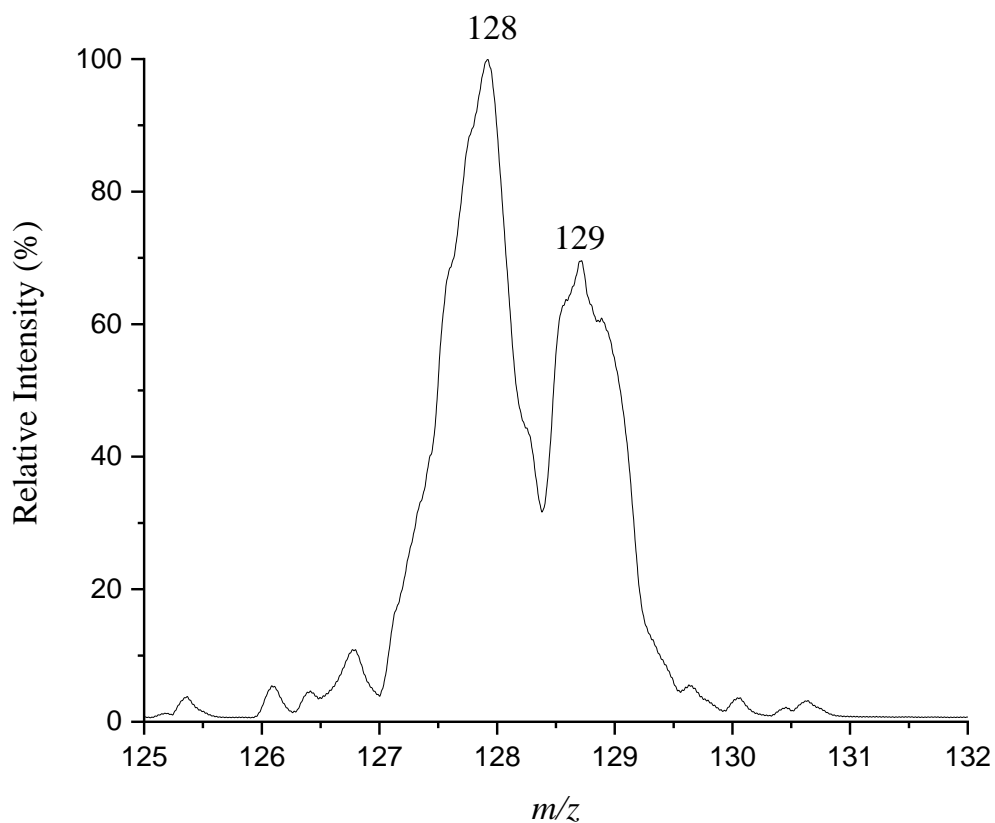

**Fig. S2** Typical product ion mass spectrum of calibration mixture analyzed on Mini  $\beta$ . The peak  $m/z$  128 is due to fragmentation of deprotonated glutamic acid ( $m/z$  146) which serves as an endogenous standard while  $m/z$  129 is due to fragmentation of deprotonated 2-hydroxyglutaric acid ( $m/z$  147). Both precursor ions were isolated together prior to the product ion scan being recorded

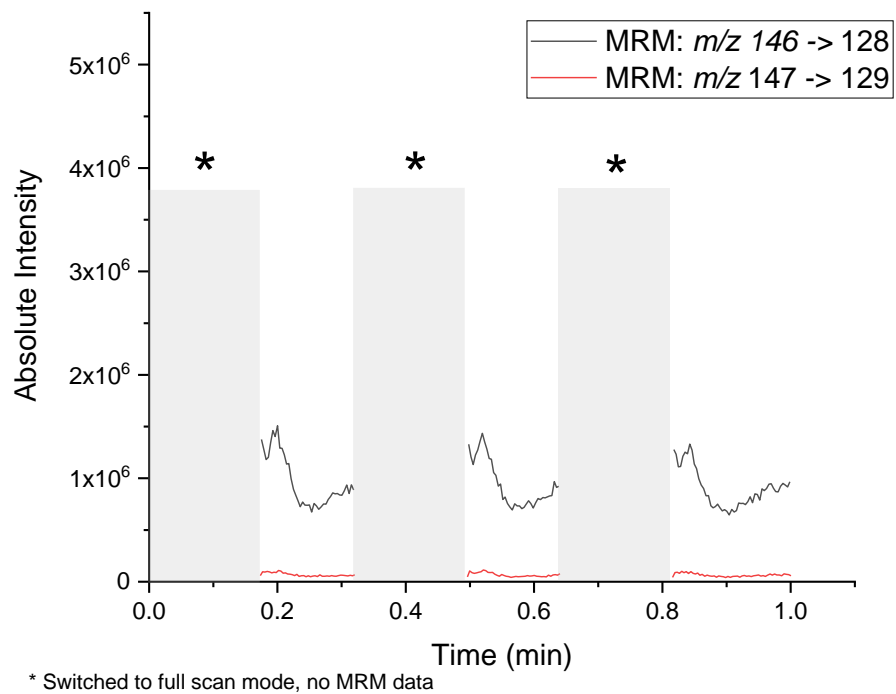

**Fig. S3** Extracted ion chromatogram obtained using Thermo TSQ of an IDH wild-type human glioma. The method used to collect data alternates between full scan and MRM, resulting in EIC discontinuity

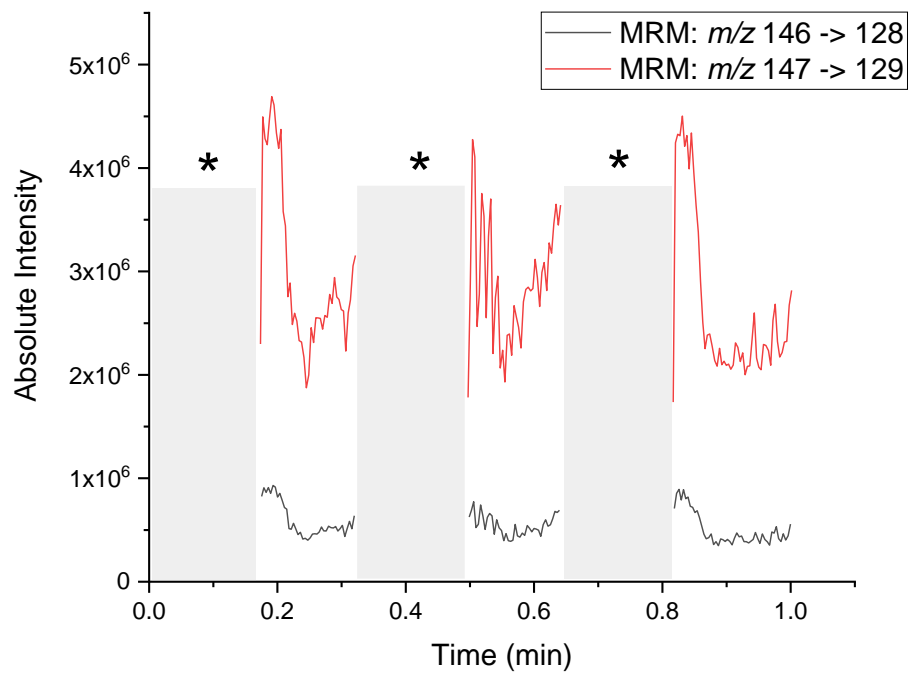

\* Switched to full scan mode, no MRM data

**Fig. S4** Extracted ion chromatogram obtained using Thermo TSQ of an IDH mutant human glioma. The method used to collect data alternates between full scan and MRM, resulting in EIC discontinuity

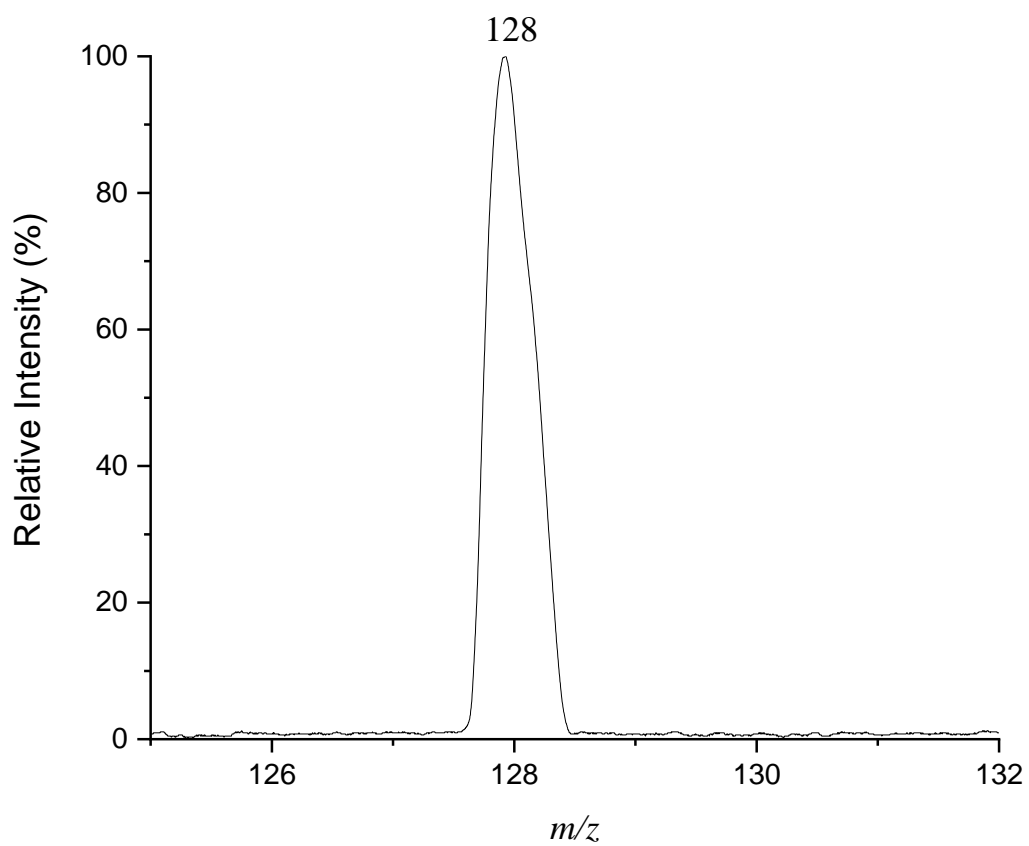

**Fig. S5** Representative product ion mass spectrum of an IDH wild-type human glioma analyzed using Mini  $\beta$ . Note the absence of a signal for 2-HG at  $m/z$  129

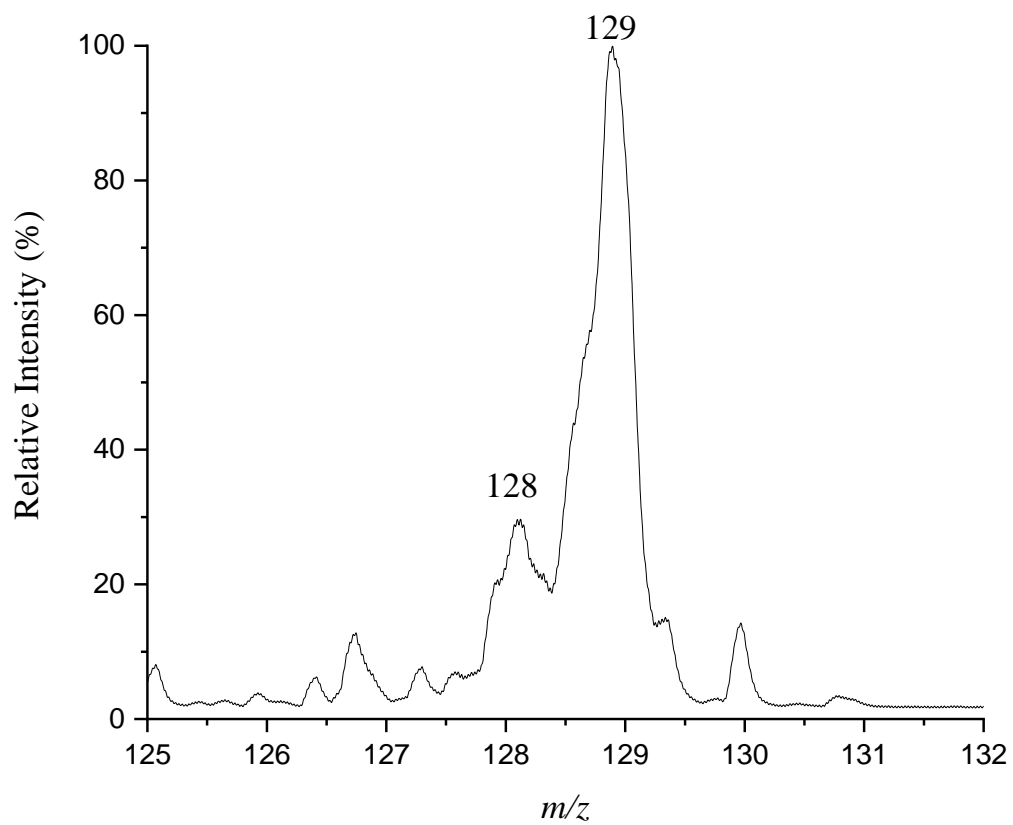

**Fig. S6** Product ion mass spectrum of an IDH mutant human glioma analyzed on Mini  $\beta$ . Note the dominant signal for 2-HG at  $m/z$  129
